# Supplementary material
Source: MDPI journal article supplement (https://www.mdpi.com/2073-4441/12/11/3143)
Supplement: s1 [file s1]

### Supplemental On-Line Material

Figures S1 and S2 show the location and numbering of stations used by [16,24] (Figure S1) and [23] (Figure S2).

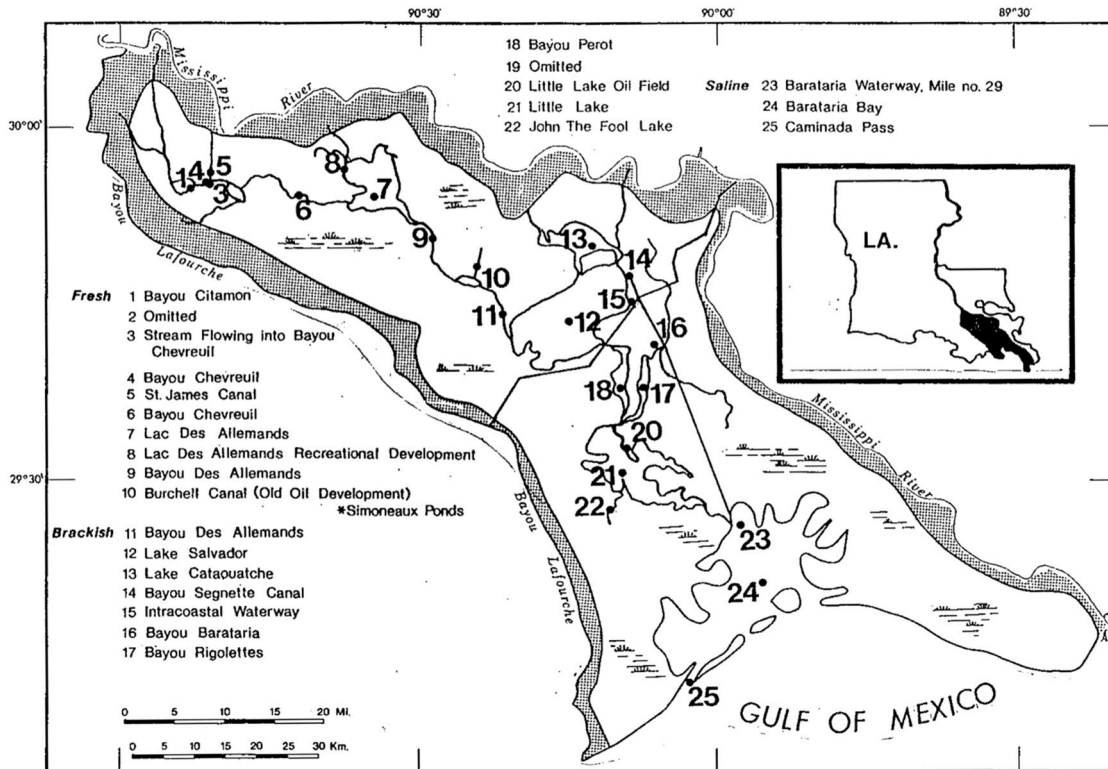

Figure S1. Station locations used by [16,24] for quarterly transects of the Barataria Basin in 1977–1978.

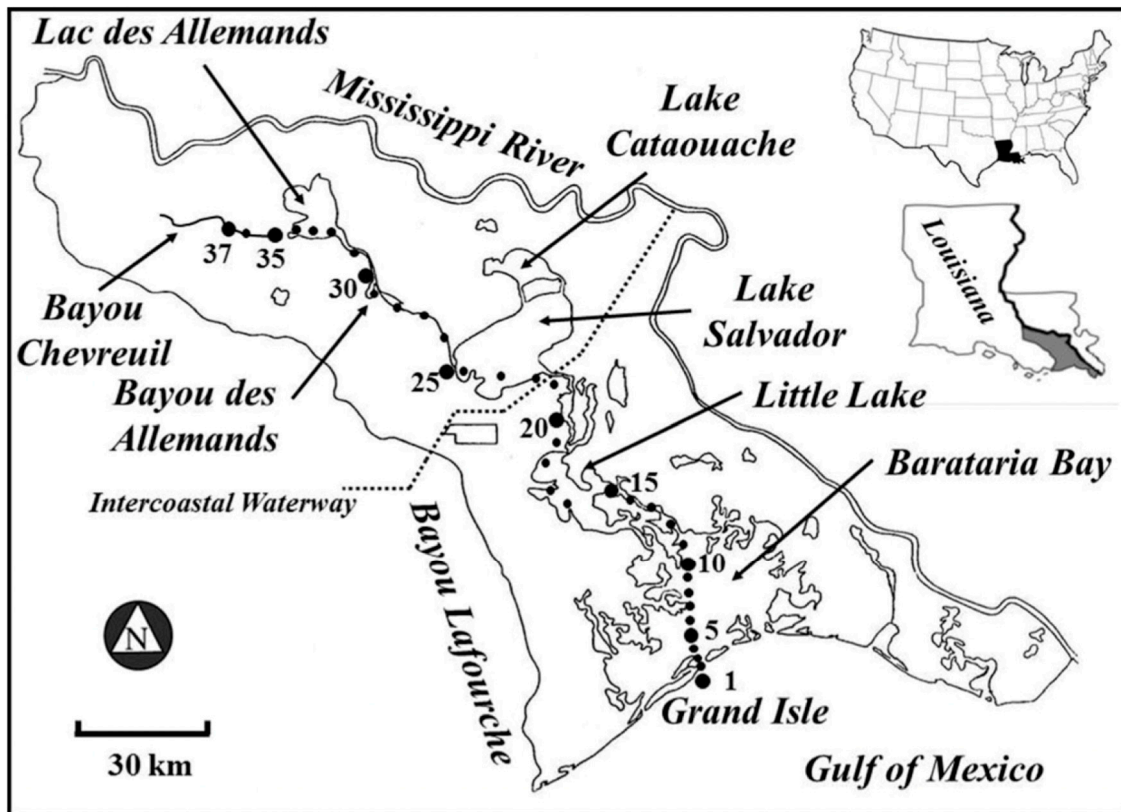

**Figure S2.** Station locations used by [23] for monthly transection in the Barataria Basin in 1995–2016. Additional stations in eastern Lake Salvador and Lake Cataouatche were added in 2005 to reflect the impact of the Davis Pond Diversion.

**Table S1.** Station groupings used for comparisons of Seaton and Turner (Pre- and Post-diversion) transects.

| Station Location      | Seaton Station Numbers | Turner Station Numbers | Station Grouping |
|-----------------------|------------------------|------------------------|------------------|
| Bayou Chevreuil       | 4, 6                   | 35, 36, 37             | BC               |
| Lac des Allemands     | 7                      | 32, 33                 | LA               |
| Bayou des Allemands N | 9                      | 30, 31                 | BAN              |
| Bayou des Allemands S | 11                     | 27, 28                 | BAS              |
| Lake Salvador         | 12                     | 23, 24                 | LS               |
| Lake Cataouatche      | 13                     | EM04, EM05             | LC               |
| Bayou Perot           | 18                     | 19, 20                 | BP               |
| Little Lake           | 21                     | 16, 17, 18             | LL               |
| Barataria Bay N       | 23                     | 9, 10, 11, 12          | BBN              |
| Barataria Bay S       | 24                     | 5, 6, 7, 8             | BBS              |
| Gulf of Mexico        | 25                     | 2                      | GOM              |
